# Supplementary material for: Rolling the evolutionary dice: Neisseria commensals as proxies for elucidating the underpinnings of antibiotic resistance mechanisms and evolution in human pathogens
Source: PubMed Central journal article supplement (PMC10557713; doi:10.1101/2023.09.26.559611), 2023-09-26
Supplement: media-1.pdf [file media-1.pdf]

**Supplemental Table 2. The impact of species on evolved MICs, 2-way ANOVA interaction results ordered by adjusted P-value**

| <b>Comparison</b>              | <b>Adjusted P</b> |
|--------------------------------|-------------------|
| #AZI:N.elongata-AZI:N.cinerea  | 0.03599           |
| #AZI:N.subflava-AZI:N.elongata | 0.03599           |
| #AZI:N.cinerea-AZI:N.canis     | 0.4938929         |
| #AZI:N.subflava-AZI:N.canis    | 0.4938929         |
| #AZI:N.elongata-AZI:N.canis    | 0.8257135         |
| #PEN:N.cinerea-PEN:N.canis     | 0.9999931         |
| #PEN:N.elongata-PEN:N.cinerea  | 0.9999968         |
| #PEN:N.subflava-PEN:N.cinerea  | 0.9999995         |
| #PEN:N.elongata-PEN:N.canis    | 1                 |
| #PEN:N.subflava-PEN:N.canis    | 1                 |
| #AZI:N.subflava-AZI:N.cinerea  | 1                 |
| #PEN:N.subflava-PEN:N.elongata | 1                 |

**Supplemental Table 3. The impact of species on MIC fold-change, 2-way ANOVA interaction results ordered by adjusted P-value**

| <b>Comparison</b>              | <b>Adjusted P</b> |
|--------------------------------|-------------------|
| #AZI:N.elongata-AZI:N.canis    | 0.0000018         |
| #PEN:N.cinerea-PEN:N.canis     | 0.0001473         |
| #AZI:N.subflava-AZI:N.elongata | 0.0002319         |
| #PEN:N.subflava-PEN:N.cinerea  | 0.0045885         |
| #AZI:N.cinerea-AZI:N.canis     | 0.0084122         |
| #PEN:N.elongata-PEN:N.cinerea  | 0.0085094         |
| #AZI:N.elongata-AZI:N.cinerea  | 0.0300176         |
| #AZI:N.subflava-AZI:N.canis    | 0.4613159         |
| #AZI:N.subflava-AZI:N.cinerea  | 0.4870153         |
| #PEN:N.elongata-PEN:N.canis    | 0.7070757         |
| #PEN:N.subflava-PEN:N.canis    | 0.8444889         |
| #PEN:N.subflava-PEN:N.elongata | 0.9999949         |
