# Supplementary material for: Rolling the evolutionary dice: Neisseria commensals as proxies for elucidating the underpinnings of antibiotic resistance mechanisms and evolution in human pathogens
Source: PubMed Central journal article supplement (PMC10557713; doi:10.1101/2023.09.26.559611), 2023-09-26
Supplement: media-2.pdf [file media-2.pdf]

**Supplementary Table 1. MICs and number of derived mutations compared to ancestral reference sequences for single colony picks of evolved lineages**

| Species            | Strain    | Selective agent | MIC of derived strains after selection |
|--------------------|-----------|-----------------|----------------------------------------|
| <i>N. canis</i>    | AR0948.C1 | Azi             | 0.38                                   |
| <i>N. canis</i>    | AR0948.C2 | Azi             | 0.38                                   |
| <i>N. canis</i>    | AR0948.C3 | Azi             | 0.38                                   |
| <i>N. canis</i>    | AR0948A.1 | Azi             | 16                                     |
| <i>N. canis</i>    | AR0948B.1 | Azi             | 48                                     |
| <i>N. canis</i>    | AR0948C.1 | Azi             | 48                                     |
| <i>N. canis</i>    | AR0948D.1 | Azi             | 32                                     |
| <i>N. canis</i>    | AR0948.C1 | Pen             | 0.25                                   |
| <i>N. canis</i>    | AR0948.C2 | Pen             | 0.25                                   |
| <i>N. canis</i>    | AR0948.C3 | Pen             | 0.25                                   |
| <i>N. canis</i>    | G4.S1.1   | Pen             | 3                                      |
| <i>N. canis</i>    | G4.S2.1   | Pen             | †                                      |
| <i>N. canis</i>    | G4.S3.2   | Pen             | 2                                      |
| <i>N. canis</i>    | G4.S4.1   | Pen             | †                                      |
| <i>N. cinerea</i>  | AR0944.C1 | Azi             | 8                                      |
| <i>N. cinerea</i>  | AR0944.C2 | Azi             | 6                                      |
| <i>N. cinerea</i>  | AR0944.C3 | Azi             | 8                                      |
| <i>N. cinerea</i>  | G2.S1.1   | Azi             | †                                      |
| <i>N. cinerea</i>  | G2.S2.1   | Azi             | 256                                    |
| <i>N. cinerea</i>  | G2.S3.1   | Azi             | †                                      |
| <i>N. cinerea</i>  | G2.S4.1   | Azi             | 256                                    |
| <i>N. cinerea</i>  | AR0944.C1 | Pen             | 0.38                                   |
| <i>N. cinerea</i>  | AR0944.C2 | Pen             | 0.38                                   |
| <i>N. cinerea</i>  | AR0944.C3 | Pen             | 0.38                                   |
| <i>N. cinerea</i>  | AR0944A.1 | Pen             | 12                                     |
| <i>N. cinerea</i>  | AR0944B.1 | Pen             | 4                                      |
| <i>N. cinerea</i>  | AR0944C.1 | Pen             | 2                                      |
| <i>N. cinerea</i>  | AR0944D.1 | Pen             | 6                                      |
| <i>N. elongata</i> | AR0945.C1 | Azi             | 0.5                                    |
| <i>N. elongata</i> | AR0945.C2 | Azi             | 0.75                                   |
| <i>N. elongata</i> | AR0945.C3 | Azi             | 0.5                                    |
| <i>N. elongata</i> | AR0945A.1 | Azi             | †                                      |
| <i>N. elongata</i> | AR0945B.1 | Azi             | 1                                      |
| <i>N. elongata</i> | AR0945C.1 | Azi             | 0.5                                    |
| <i>N. elongata</i> | AR0945D.1 | Azi             | 0.25                                   |
| <i>N. elongata</i> | AR0945.C1 | Pen             | 0.25                                   |
| <i>N. elongata</i> | AR0945.C2 | Pen             | 0.25                                   |
| <i>N. elongata</i> | AR0945.C3 | Pen             | 0.25                                   |
| <i>N. elongata</i> | G5.S1.1   | Pen             | 1                                      |
| <i>N. elongata</i> | G5.S2.1   | Pen             | †                                      |
| <i>N. elongata</i> | G5.S3.1   | Pen             | 2                                      |
| <i>N. elongata</i> | G5.S4.1   | Pen             | 12                                     |
| <i>N. subflava</i> | G1.S1.1   | Azi             | 256                                    |
| <i>N. subflava</i> | G1.S2.1   | Azi             | 256                                    |
| <i>N. subflava</i> | G1.S3.1   | Azi             | 96                                     |
| <i>N. subflava</i> | G1.S4.1   | Azi             | 96                                     |
| <i>N. subflava</i> | G3.S1.1   | Pen             | 4                                      |
| <i>N. subflava</i> | G3.S2.1   | Pen             | 6                                      |
| <i>N. subflava</i> | G3.S3.1   | Pen             | 4                                      |
| <i>N. subflava</i> | G3.S4.1   | Pen             | 0.75                                   |
| <i>N.subflava</i>  | AR0953.C1 | Azi             | 2                                      |
| <i>N.subflava</i>  | AR0953.C2 | Azi             | 1                                      |
| <i>N.subflava</i>  | AR0953.C3 | Azi             | 1                                      |
| <i>N.subflava</i>  | AR0957.C1 | Azi             | 8                                      |
| <i>N.subflava</i>  | AR0957.C2 | Azi             | 8                                      |
| <i>N.subflava</i>  | AR0957.C3 | Azi             | 8                                      |
| <i>N.subflava</i>  | AR0953.C1 | Pen             | 1                                      |
| <i>N.subflava</i>  | AR0953.C2 | Pen             | 1.5                                    |
| <i>N.subflava</i>  | AR0953.C3 | Pen             | 1.5                                    |
| <i>N.subflava</i>  | AR0957.C1 | Pen             | 1                                      |
| <i>N.subflava</i>  | AR0957.C2 | Pen             | 1                                      |
| <i>N.subflava</i>  | AR0957.C3 | Pen             | 1                                      |

† Stocks of single colony picks did not grow after the initial patch plate
